# Supplementary material
Source: PubMed Central journal article supplement (PMC6287591)
Supplement: en.2018-00020.sd1.pdf [file en.2018-00020.sd1.pdf]

763 **Supplemental Figure 1: Effect of hCG stimulation on *Scg2* mRNA in rodent granulosa cells**  
764 *in vitro*. Granulosa cells from immature mice (A) and rats (B) were isolated and cultured  
765 following an ovarian stimulation protocol as described in Materials and Methods. Granulosa  
766 cells were treated with or without hCG and collected across the periovulatory period. Granulosa  
767 cells were processed for mRNA isolation and cDNA synthesis and were subjected to qPCR to  
768 measure the mRNA levels of *Scg2*. All values were normalized to *Rpl32*. Graph represents mean  
769  $\pm$  SEM. Bars that do not share a letter designation are significantly different (n=3-9  
770 rodents/group,  $p \leq 0.05$ ).
